# Supplementary material for: De Novo Protein Design of Photochemical Reaction Centers
Source: Research Square preprint supplement (doi:10.21203/rs.3.rs-932621/v1), 2021-11-18
Supplement: Supplementary file 1 [file 4150b3378db5acf38a79deaf.docx]

| **Supplementary Table 1 | Sequences of Reaction Center Maquette and mutants** | |
| --- | --- |
| RC maquette variant  and description | Amino acid sequence (not including N-terminal His6-tag and  TEV protease cleavage sequence) |
| Reaction Center Maquette  (original design) | GSPELRQEHQQLAQEFQQLLQEIQQLGRELLKGELQGIKQLREASEKARNPEKKSVLQKILEDEEKHIELLETLQQTGQEAQQLLQELQQTGQELWQLGGSGGPELRQKHQQLAQKIQQLLQKHQQLGAKILEDEEKHIELLETILGGSGGDELRELLKGELQGIKQYRELQQLGQKAQQLVQKLQQTGQKLWQLG |
| L71H mutant  (H71-Y168 hydrogen-bonded pair) | GSPELRQEHQQLAQEFQQLLQEIQQLGRELLKGELQGIKQLREASEKARNPEKKSVLQKILEDEEKHIELHETLQQTGQEAQQLLQELQQTGQELWQLGGSGGPELRQKHQQLAQKIQQLLQKHQQLGAKILEDEEKHIELLETILGGSGGDELRELLKGELQGIKQYRELQQLGQKAQQLVQKLQQTGQKLWQLG |
| L31D/L71H mutant  (Increased solvent accessibility to H71-Y168 hydrogen-bonded pair) | GSPELRQEHQQLAQEFQQLLQEIQQLGRELDKGELQGIKQLREASEKARNPEKKSVLQKILEDEEKHIELHETLQQTGQEAQQLLQELQQTGQELWQLGGSGGPELRQKHQQLAQKIQQLLQKHQQLGAKILEDEEKHIELLETILGGSGGDELRELLKGELQGIKQYRELQQLGQKAQQLVQKLQQTGQKLWQLG |
| Y168L mutant  (Tyr-free control) | GSPELRQEHQQLAQEFQQLLQEIQQLGRELLKGELQGIKQLREASEKARNPEKKSVLQKILEDEEKHIELLETLQQTGQEAQQLLQELQQTGQELWQLGGSGGPELRQKHQQLAQKIQQLLQKHQQLGAKILEDEEKHIELLETILGGSGGDELRELLKGELQGIKQLRELQQLGQKAQQLVQKLQQTGQKLWQLG |
| Y168L/G164C mutant  (for crosslinking C164-ferrocene to make Fc164) | GSPELRQEHQQLAQEFQQLLQEIQQLGRELLKGELQGIKQLREASEKARNPEKKSVLQKILEDEEKHIELLETLQQTGQEAQQLLQELQQTGQELWQLGGSGGPELRQKHQQLAQKIQQLLQKHQQLGAKILEDEEKHIELLETILGGSGGDELRELLKGELQCIKQLRELQQLGQKAQQLVQKLQQTGQKLWQLG |
| Y168C mutant  (for crosslinking C168-ferrocene to make Fc168) | GSPELRQEHQQLAQEFQQLLQEIQQLGRELLKGELQGIKQLREASEKARNPEKKSVLQKILEDEEKHIELLETLQQTGQEAQQLLQELQQTGQELWQLGGSGGPELRQKHQQLAQKIQQLLQKHQQLGAKILEDEEKHIELLETILGGSGGDELRELLKGELQGIKQCRELQQLGQKAQQLVQKLQQTGQKLWQLG |

| **Supplementary Table 2 | Crystallization conditions used to obtain RC maquette crystal structures** | | | | | |
| --- | --- | --- | --- | --- | --- |
| Crystal Structure | RC maquette stock concentration | Cofactors in stock solution* | Well solution | Drop volumes  (well solution: protein stock) | Cryoprotectant† |
| RC maquette,  Original design  (PDB ID: 5VJS) | 12.4 mg/mL  (550 μM) | Heme B, ZnP, 1.5 mM ZnCl2 | 3.6 M NaCl, 100 mM NaAc‡, pH 4.5 | 1 μL:1 μL | 30% glycerol, 3.5 M NaCl, 100 mM NaAc pH 4.4 |
| RC maquette,  Original design  (PDB ID: 5VJT) | 14.2 mg/mL  (630 μM) | Heme B, 1.5 mM ZnCl2 | 2.7 M NaCl, 100 mM NaAc, pH 4.5 | 1 μL:1 μL | 30% glycerol, 3.5 M NaCl, 100 mM NaAc pH 4.4 |
| RC maquette,  L71H mutant (PDB ID: 5VJU) | 14.2 mg/mL  (630 μM) | Heme B | 24% w/v PEG§ 1500, 70 mM CdCl2, 100 mM NaAc pH 4.6 | 5 μL: 1 μL, seeds|| | 40% v/v glycerol, 70 mM CdCl2, 100 mM NaAc pH 4.6 |
| * Porphyrin cofactors in stock solution had same molar concentration as protein.  † Crystals were dipped in the indicated cryoprotectant immediately prior to flash freezing in liquid nitrogen or a nitrogen gas stream at 100 K.  ‡ NaAc stands for sodium acetate.  § PEG stands for polyethylene glycol.  || Streak seeded with cat whisker from crystals grown with the same protein stock solution hanging over 25% PEG 1500, 80 mM CdCl2, 100 mM NaAc, pH 4.6 | | | | | |

| **Supplementary Table 3 | Multiwavelength anomalous dispersion (MAD) statistics for crystal structure 5VJS** | | | |
| --- | --- | --- | --- |
| **Measurement** | **Zn K edge** | **Zn K inflection point** | **Remote energy** |
| Wavelength (Å) | 1.2824 | 1.2831 | 1.0781 |
| Resolution (Å) | 2.1 | 2.1 | 2.0 |
| Completeness (%) | 99.1 | 99.1 | 99.4 |
| I/σ(I) | 18.2 | 19.5 | 16.8 |
| Rmerge (%) | 6.6 | 6.3 | 8.5 |

| **Supplementary Table 4 | X-ray crystallographic data collection and refinement statistics** | | | |
| --- | --- | --- | --- |
| Protein | RC maquette  (original design) | RC maquette  (original design) | RC maquette  (L71H mutant) |
| PDB ID | 5VJS | 5VJT | 5VJU |
| Cofactors | Heme B  ZnP  Tyr  Zn(II) | Heme B  --  Tyr  Zn(II) | Heme B  --  H-bonded His-Tyr  Cd(II) |
| **Data Collection** | | | |
| Space group | P41212 | P41212 | P21 |
| X-ray source | NSLS  X6A Beamline | NSLS  X6A Beamline | Rotating Anode Cu Kα |
| Wavelength (Å) | 1.0781 | 1.0781 | 1.54178 |
| Unit cell dimensions | | | |
| a (Å) | 43.749 | 43.747 | 44.48 |
| b (Å) | 43.749 | 43.747 | 25.88 |
| c (Å) | 245.74 | 245.52 | 73.71 |
| α (°) | 90 | 90 | 90 |
| β (°) | 90 | 90 | 103.64 |
| γ (°) | 90 | 90 | 90 |
| Resolution (Å) | 61.43 - 2.00  (2.05 – 2.00)* | 61.38 - 1.45  (1.49 – 1.45) | 71.54 - 2.02  (2.07 – 2.02) |
| Rmerge (%) | 8.5 (97.0) | 9.9 (133.7) | 5.1 (10.1) |
| I/σ(I) | 16.80 (2.52) | 15.30 (1.26) | 25.98 (9.46) |
| Completeness (%) | 99.4 (98.8) | 99.7 (96.1) | 97.3 (71.0) |
| Redundancy | 7.6 (7.4) | 8.8 (5.2) | 6.7 (3.3) |
| **Refinement** | | | |
| Resolution | 61.43 – 2.00 (2.05 – 2.00) | 41.21 – 1.45 (1.49 – 1.45) | 71.63 – 2.08 (2.13 – 2.08) |
| Unique reflections | 16,280 (1,131) | 41,378 (2,848) | 9,587 (643) |
| Rwork/Rfree | 0.235/0.278 | 0.202/0.236 | 0.183/0.243 |
| No. of non-H atoms |  |  |  |
| Protein | 1585 | 1585 | 1587 |
| Ligand | 88 | 48 | 50 |
| Water | 39 | 172 | 88 |
| Mean B factor (Å2) | 40.77 | 23.27 | 31.83 |
| R.m.s. deviations |  |  |  |
| Bonds (Å2) | 0.018 | 0.031 | 0.015 |
| Angles (°) | 1.829 | 2.236 | 1.782 |
| * Values in parentheses represent statistics from the highest resolution shell. | | | |

|  | **a** Heme (PDB ID: 5VJT) | **b** Heme (PDB ID: 5VJU) | | **c** Heme (PDB ID: 5VJS) | | **d** Zn porphyrin (PDB ID: 5VJS) |
| --- | --- | --- | --- | --- | --- | --- |
| 1.0 σ contouring | 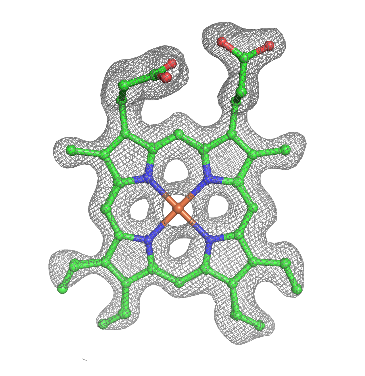 | 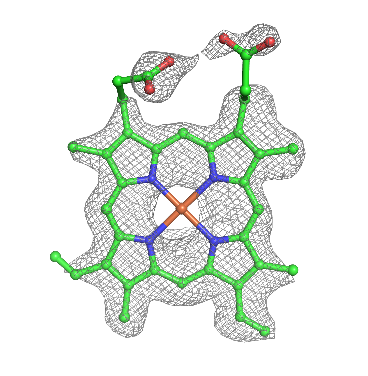 | | 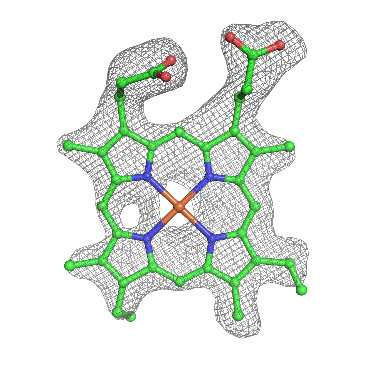 | | 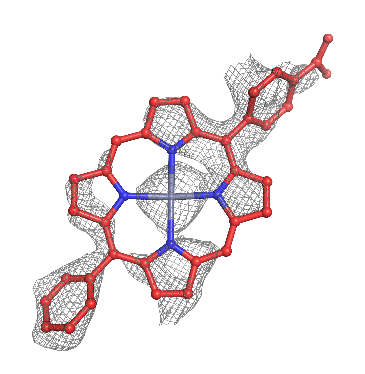 |
| 3.0 σ contouring | 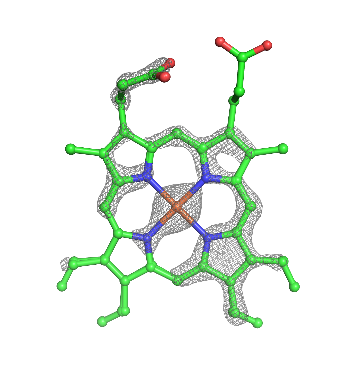 | 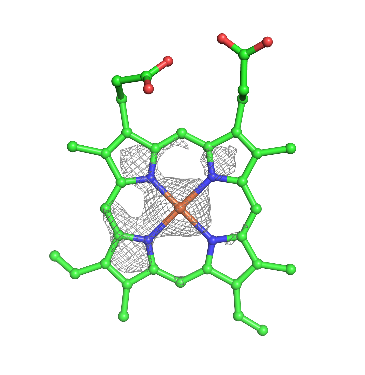 | | 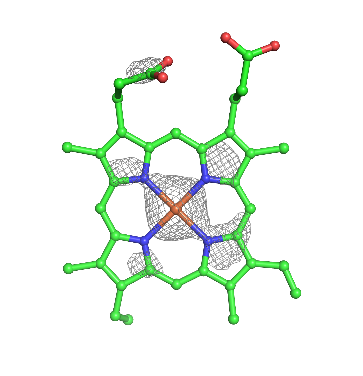 | | 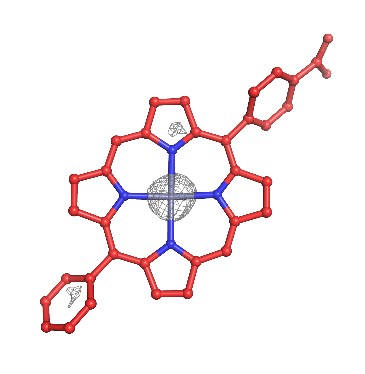 |
|  | **e** Tyr and Zn(II) ion (PDB ID: 5VJT) | | **f** His-Tyr and Cd(II) ions (PDB ID: 5VJU) | | **g** Tyr and Zn(II) ion (PDB ID: 5VJS) | |
| 1.0 σ contouring | 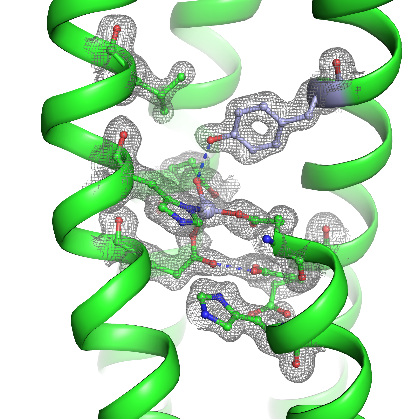 | | 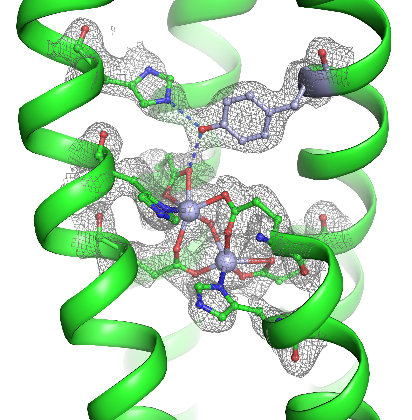 | | 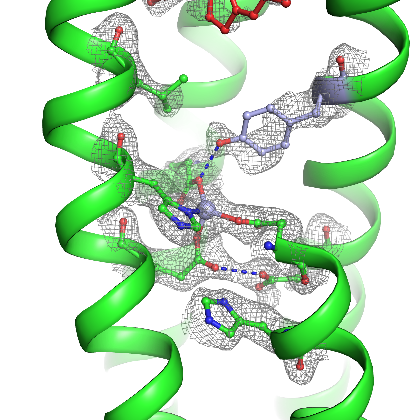 | |
| 3.0 σ contouring | 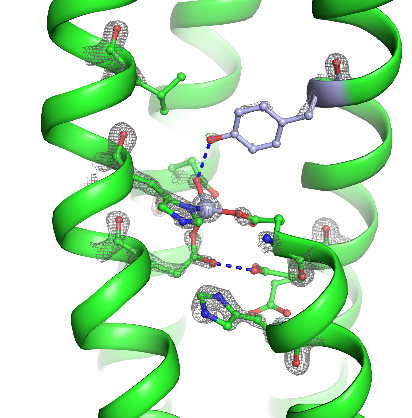 | | 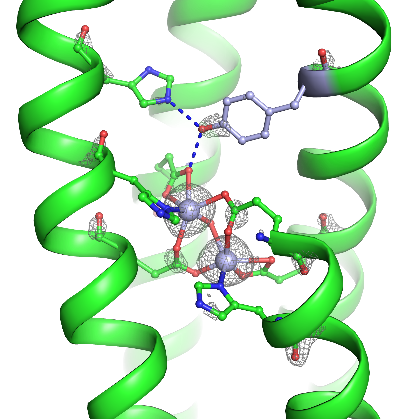 | | 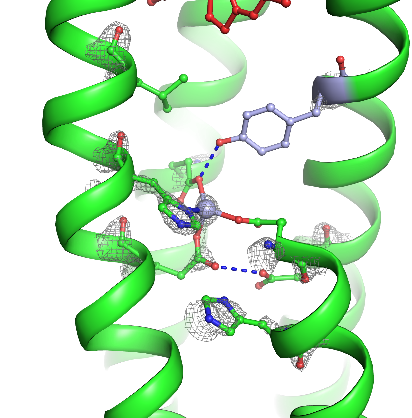 | |

**Supplementary Figure 1 | 2Fo-Fc omit maps of cofactors.** Omit maps of cofactors at 1.0 σ and 3.0 σ contouring levels (grey mesh) were created in PHENIX using simulated annealing to remove model bias. **a-c.** Omit maps of heme B electron acceptor in each of the three crystal structures (PDB IDs: 5VJT, 5VJU, and 5VJS). Heme B in structure 5VJT is modeled in two superposed conformations, giving 4 vinyl groups in the model. **d.** ZnP pigment omit map in structure 5VJS. **e-g.** Omit maps of electron donor sites. Structures 5VJT and 5VJS (panels (e) and (g)), contain only the Zn(II) ion in the metal site nearest the pigment site, but 5VJU (panel (f)) has two Cd(II) ions bound, as designed. Blue dashes indicate hydrogen bonds.
